# Supplementary material
Source: PubMed Central journal article supplement (PMC2464365)

# Supporting Information

for

## Antiproliferative Cardenolides of an *Elaeodendron sp.* from the Madagascar Rain Forest

Shugeng Cao, Peggy J. Brodie, James S. Miller, Fidy Ratovoson, Martin W. Callmander, Sennen Randrianasolo,

Etienne Rakotobe, Vincent E. Rasamison, Edward M. Suh, Karen TenDyke, and David G. I. Kingston

*Department of Chemistry, M/C 0212, Virginia Polytechnic Institute and State University, Blacksburg, Virginia 24061, Missouri Botanical Garden, P. O. Box 299, St. Louis, Missouri 63166-029 and B.P 3391, Antananarivo, Madagascar, Centre National d'Application des Recherches Pharmaceutiques, B. P. 702, Antananarivo 101, Madagascar, and Eisai Research Institute, 4 Corporate Drive, Andover, MA 01810*

$^1\text{H}$  and  $^{13}\text{C}$  NMR spectra of compounds **1 - 2**

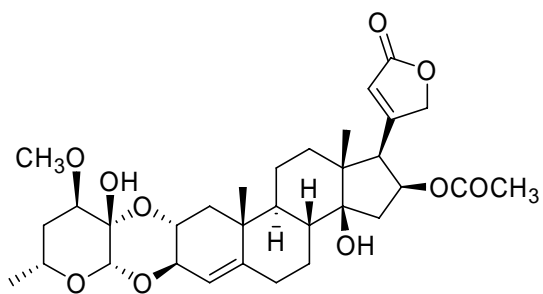

1

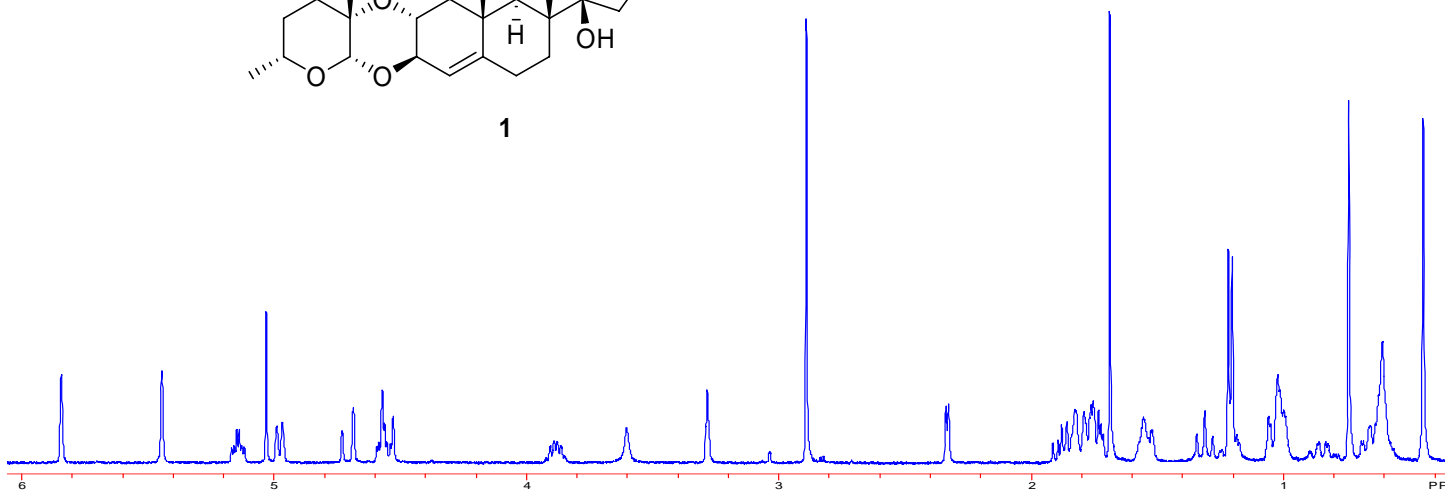

$^1\text{H}$  NMR spectrum of elaeodendroside T (**1**) in  $\text{C}_6\text{D}_6$

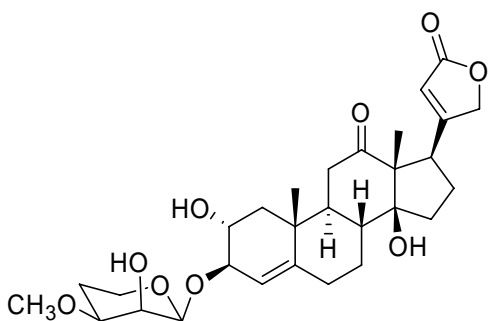

2

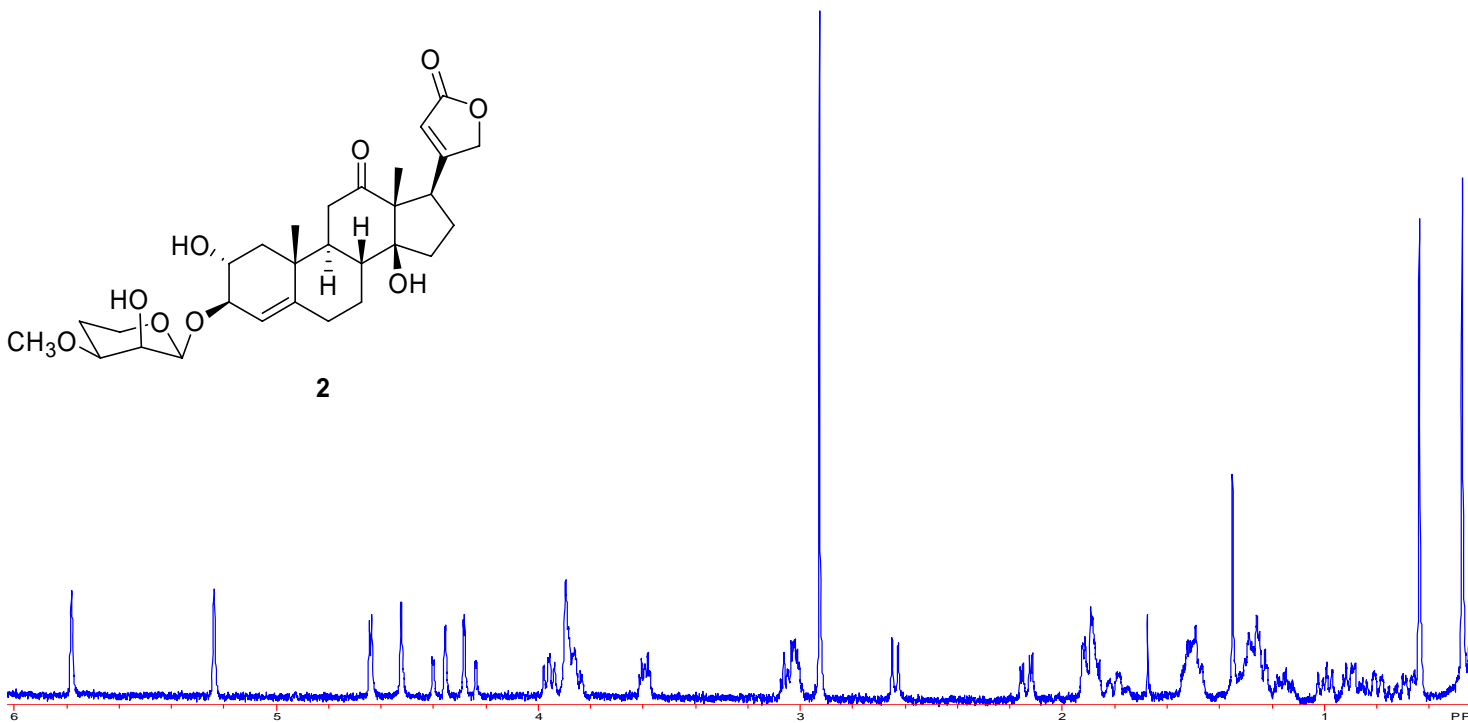

$^1\text{H}$  NMR spectrum of elaeodendroside U (**2**) in  $\text{C}_6\text{D}_6$

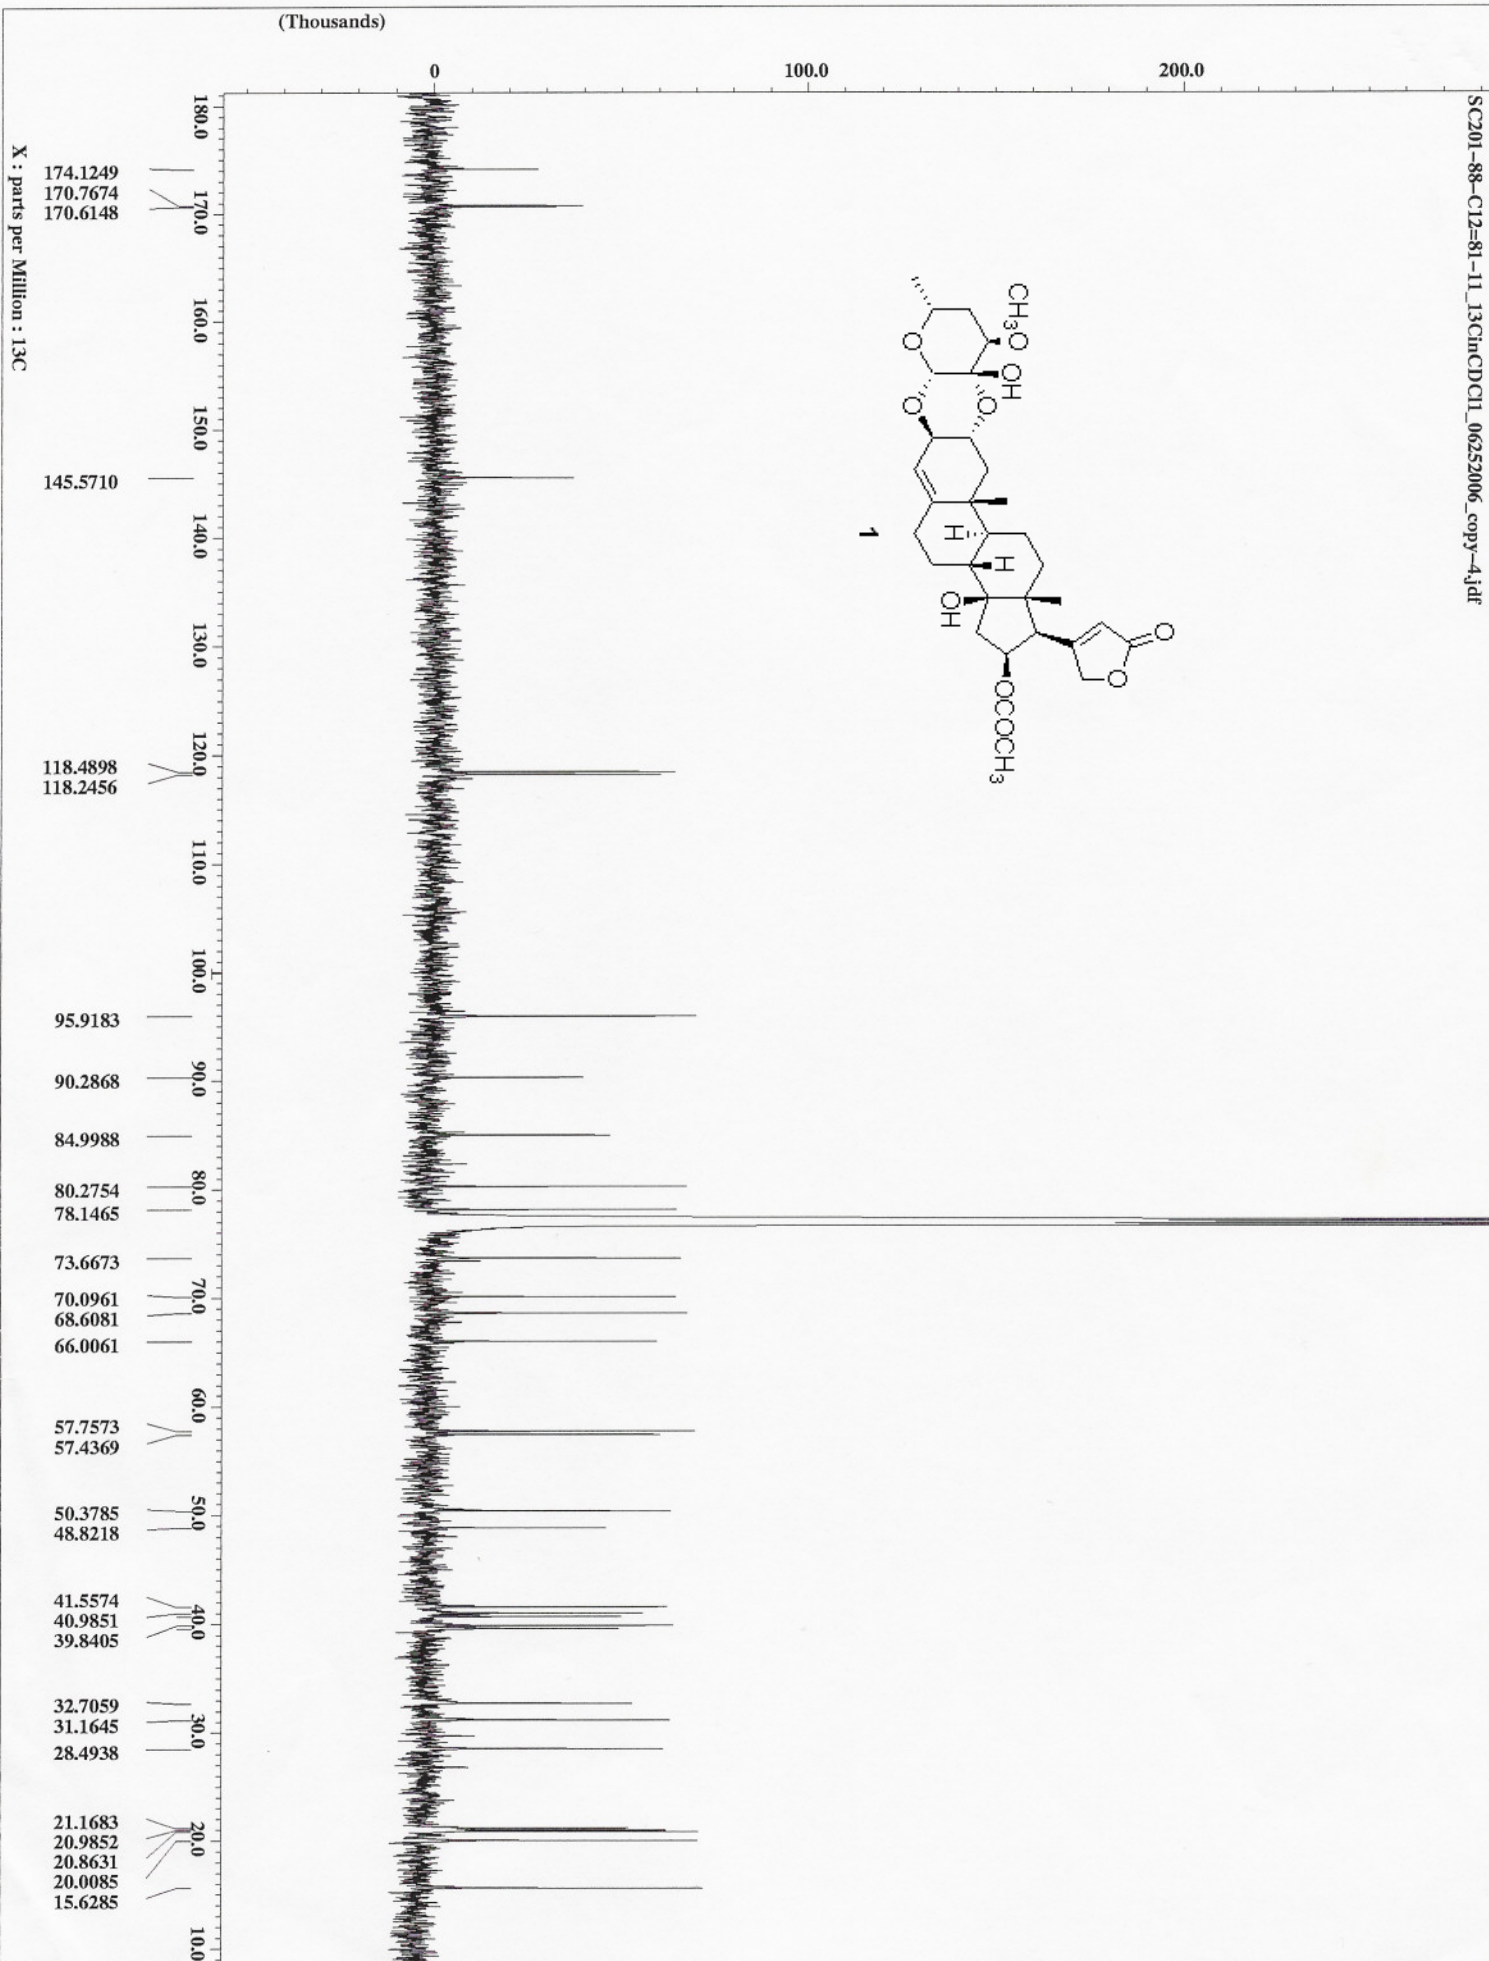

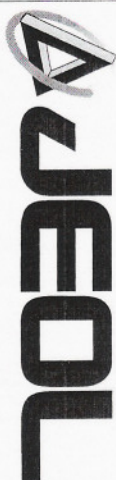

```

Filename = SC201-88-C13C_13CINDMISO
Author = Kingston
Experiment = single_pulse_dec
Sample_id = SC201-88-C13C_13CINDMISO
Solvent = DMSO-d6
Creation_time = 28-JUL-2006 08:14:43
Revision_time = 28-JUL-2006 08:20:55
Current_time = 28-JUL-2006 08:21:16

Content = Single Pulse with Bro
Data_format = ID COMPLEX
Dim_size = 32768
Dim_title = 13C
Dim_units = [ppm]
Dimensions = X
Site = Delta NMR
Spectrometer = DELTA NMR

Field_strength = 11.74735791[T] (500[MH
X_acq_duration = 1.0420224[ls]
X_domain = 13C
X_freq = 125.76529768[MHz]
X_offset = 100[ppm]
X_points = 32768
X_prescans = 4
X_resolution = 0.95967227[Hz]
X_sweep = 31.446540881[KHz]
Irr_domain = 1H
Irr_freq = 500.15991521[MHz]
Irr_offset = 5[ppm]
Clipped = FALSE
Mod_return = 1
Scans = 26889
Total_scans = 26889

X_90_width = 11[us]
X_acq_time = 1.0420224[ls]
X_angle = 45[deg]
X_pulse = 5.5[us]
Initial_wait = 1[ls]
Phase_preset = 3[us]
Recvr_gain = 28
Relaxation_delay = 1[ls]
Temp_get = 24.2[dc]
Unblank_time = 2[us]
    
```

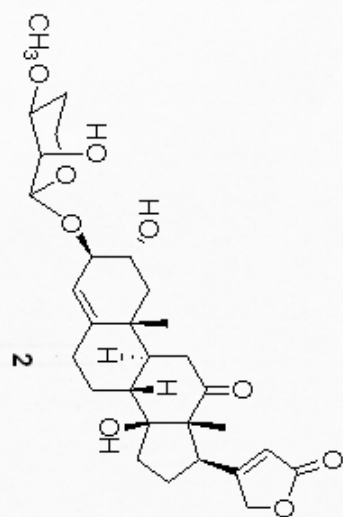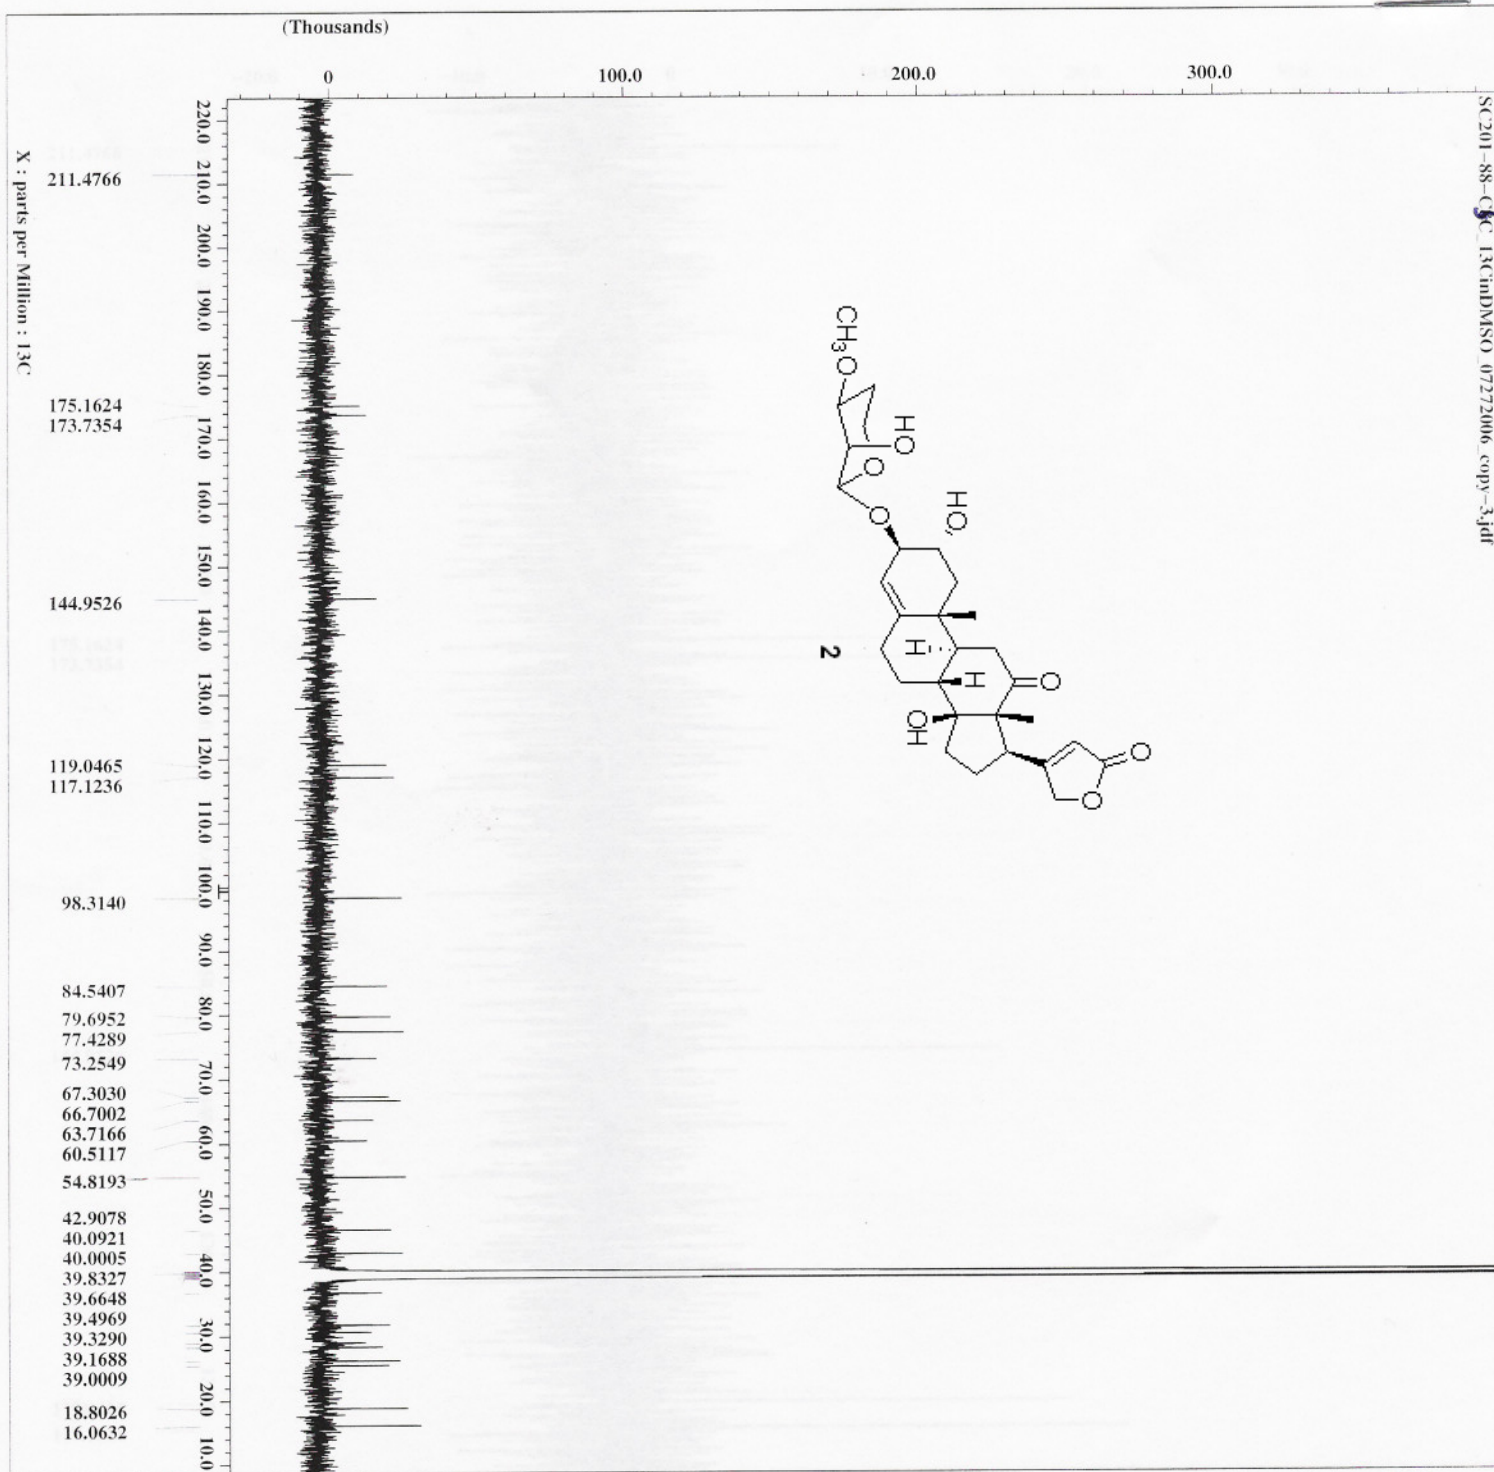

Supplement: NIHMS49562-supplement-1.pdf [file NIHMS49562-supplement-1.pdf]
